# Supplementary material for: Unravelling Genetic Factors Underlying Corticobasal Syndrome: A Systematic Review
Source: PubMed Central journal article supplement (PMC7830591; doi:10.3390/cells10010171), 2021-01-15
Supplement: cells-10-00171-s001.pdf [file cells-10-00171-s001.pdf]

|                                                                   | PRGN        | MAPT        | C9ORF72    | <i>p</i> value<br>GRN vs MAPT | <i>p</i> value<br>GRN vs C9ORF72 |
|-------------------------------------------------------------------|-------------|-------------|------------|-------------------------------|----------------------------------|
| Number of patients                                                | 28          | 9           | 6          | –                             | –                                |
| Gender, male<br>(GRN 17; MAPT 9; C9ORF72 6)                       | 58.8% (10)  | 44.4% (4)   | 33.3% (2)  | 0.683                         | 0.371                            |
| Age at disease onset, years<br>(GRN 25; MAPT 9; C9ORF72 6)        | 58.1 ± 8.1  | 48.2 ± 13.8 | 50.2 ± 6.6 | <b>0.015</b>                  | <b>0.034</b>                     |
| Asymmetric akinetic-rigid syndrome<br>(GRN 28; MAPT 9; C9ORF72 6) | 96.4% (27)  | 100.0% (9)  | 100% (6)   | 0.999                         | 0.999                            |
| Apraxia<br>(GRN 24; MAPT 9; C9ORF72 6)                            | 75.0% (18)  | 66.7 % (6)  | 50.0% (3)  | 0.677                         | 0.329                            |
| Gait dysfunction<br>(GRN 28; MAPT 9; C9ORF72 6)                   | 3.6% (1)    | 66.7 % (6)  | 66.7% (4)  | <b>&lt; 0.001</b>             | <b>0.002</b>                     |
| Tremor<br>(GRN 24; MAPT 9; C9ORF72 6)                             | 4.2% (1)    | 44.4% (4)   | 16.7% (1)  | <b>0.013</b>                  | 0.366                            |
| Dystonia<br>(GRN 24; MAPT 9; C9ORF72 6)                           | 20.8% (5)   | 77.8% (7)   | 33.3% (2)  | <b>0.005</b>                  | 0.603                            |
| Myoclonus<br>(GRN 24; MAPT 9; C9ORF72 6)                          | 16.7% (4)   | 22.2% (2)   | 0% (0)     | 0.999                         | 0.557                            |
| Pyramidal signs<br>(GRN 24; MAPT 9; C9ORF72 6)                    | 8.3% (2)    | 33.3% (3)   | 16.7% (1)  | 0.111                         | 0.501                            |
| Oculomotor dysfunction<br>(GRN 23; MAPT 9; C9ORF72 6)             | 4.3% (1)    | 55.6% (5)   | 0% (0)     | <b>0.003</b>                  | 0.999                            |
| Bulbar involvement<br>(GRN 28; MAPT 9; C9ORF72 6)                 | 10.7% (3)   | 55.6% (5)   | 50.0% (3)  | <b>0.012</b>                  | 0.053                            |
| Aphasia/language impairment<br>(GRN 24; MAPT 9; C9ORF72 6)        | 70.8% (17)  | 44.4% (4)   | 16.7% (1)  | 0.230                         | <b>0.026</b>                     |
| Visuospatial impairment<br>(GRN 20; MAPT 9; C9ORF72 6)            | 50.0% (10)  | 0% (0)      | 0% (0)     | <b>0.011</b>                  | 0.053                            |
| Cognitive impairment<br>(GRN 23; MAPT 9; C9ORF72 6)               | 82.6 % (19) | 55.6% (5)   | 83.3% (5)  | 0.176                         | 0.999                            |
| Behavioural changes<br>(GRN 24; MAPT 9; C9ORF72 6)                | 66.7% (16)  | 11.1% (1)   | 33.3% (2)  | <b>0.007</b>                  | 0.184                            |
| Frontal lobe syndrome<br>(GRN 23; MAPT 9; C9ORF72 6)              | 73.9% (17)  | 33.3% (3)   | 83.3% (5)  | <b>0.049</b>                  | 0.999                            |
| Cortical sensory loss<br>(GRN 24; MAPT 9; C9ORF72 6)              | 12.5% (3)   | 33.3% (3)   | 0% (0)     | 0.309                         | 0.999                            |
| Alien Limb<br>(GRN 24; MAPT 9; C9ORF72 6)                         | 12.3% (3)   | 33.3% (3)   | 0% (0)     | 0.309                         | 0.999                            |

**Supplementary Table 1.** Analysis of clinical features of GRN, MAPT and C9ORF72 carriers. Comparisons have been made between GRN vs MAPT and GRN vs C9ORF72 cases. Statistically significant results are highlighted; threshold for statistical significance was  $p < 0.05$ .
